# Supplementary material
Source: MDPI journal article supplement (https://www.mdpi.com/2071-1050/14/11/6394)
Supplement: s1 [file s1]

# SUPPLEMENTARY MATERIALS

**Table S1.** Data of Freiburg's small green areas (FG). The table includes geographic positions and number of bird species observed at the selected nine small green areas.

|                                     | FG1     | FG2      | FG3    | FG4       | FG5       | FG6       | FG7       | FG8     | FG9       |
|-------------------------------------|---------|----------|--------|-----------|-----------|-----------|-----------|---------|-----------|
| <b><u>Geographic position</u></b>   |         |          |        |           |           |           |           |         |           |
| Latitude                            | 48.0153 | 48.00085 | 48.003 | 47.998461 | 47.993908 | 47.990414 | 47.978753 | 47.9915 | 47.984703 |
| Longitude                           | 7.8199  | 7.842761 | 7.8542 | 7.815597  | 7.826453  | 7.845999  | 7.802353  | 7.8086  | 7.822078  |
| <b><u>Bird species observed</u></b> |         |          |        |           |           |           |           |         |           |
| <i>Anas platyrhynchos</i>           | 0       | 0        | 0      | 0         | 0         | 10        | 0         | 0       | 0         |
| <i>Apus apus</i>                    | 0       | 1        | 0      | 0         | 0         | 1         | 0         | 0       | 0         |
| <i>Ardea cinerea</i>                | 0       | 0        | 0      | 0         | 0         | 1         | 0         | 0       | 0         |
| <i>Carduelis carduelis</i>          | 0       | 0        | 0      | 0         | 1         | 0         | 0         | 0       | 0         |
| <i>Certhia familiaris</i>           | 0       | 1        | 0      | 1         | 0         | 0         | 0         | 0       | 0         |
| <i>Columba livia</i>                | 1       | 4        | 2      | 46        | 3         | 2         | 6         | 5       | 6         |
| <i>Columba palumbus</i>             | 0       | 2        | 0      | 0         | 0         | 0         | 0         | 0       | 0         |
| <i>Corvus corone</i>                | 23      | 4        | 5      | 1         | 0         | 0         | 0         | 2       | 0         |
| <i>Cyanistes caeruleus</i>          | 0       | 0        | 0      | 0         | 6         | 0         | 0         | 0       | 0         |
| <i>Delichon urbicum</i>             | 0       | 0        | 0      | 0         | 0         | 0         | 5         | 0       | 0         |
| <i>Dendrocoptes medius</i>          | 0       | 1        | 0      | 0         | 0         | 0         | 0         | 0       | 0         |
| <i>Ficedula hypoleuca</i>           | 0       | 0        | 0      | 0         | 0         | 0         | 0         | 2       | 0         |
| <i>Fringilla coelebs</i>            | 0       | 2        | 1      | 0         | 0         | 0         | 0         | 0       | 0         |
| <i>Motacilla cinerea</i>            | 0       | 0        | 0      | 0         | 0         | 1         | 0         | 0       | 0         |
| <i>Parus major</i>                  | 5       | 1        | 0      | 2         | 1         | 0         | 2         | 2       | 0         |
| <i>Passer domesticus</i>            | 5       | 30       | 2      | 0         | 25        | 3         | 0         | 3       | 78        |
| <i>Phoenicurus ochruros</i>         | 0       | 0        | 0      | 0         | 1         | 0         | 0         | 0       | 3         |

|                                | FG1 | FG2 | FG3 | FG4 | FG5 | FG6 | FG7 | FG8 | FG9 |
|--------------------------------|-----|-----|-----|-----|-----|-----|-----|-----|-----|
| <i>Phylloscopus collybita</i>  | 0   | 0   | 0   | 5   | 0   | 0   | 1   | 0   | 0   |
| <i>Sturnus vulgaris</i>        | 0   | 0   | 0   | 0   | 0   | 0   | 0   | 0   | 1   |
| <i>Troglodytes troglodytes</i> | 0   | 0   | 0   | 0   | 1   | 0   | 0   | 0   | 0   |
| <i>Turdus merula</i>           | 4   | 1   | 0   | 2   | 0   | 0   | 1   | 1   | 1   |

**Table S2.** Data of Regensburg's small green areas (RG). The table includes geographic positions and number of bird species observed at the selected eight green areas.

|                              | RG1     | RG2     | RG3     | RG4     | RG5     | RG6     | RG7     | RG8     |
|------------------------------|---------|---------|---------|---------|---------|---------|---------|---------|
| <b>Geographic position</b>   |         |         |         |         |         |         |         |         |
| Latitude                     | 49.0185 | 49.0149 | 49.0015 | 49.0215 | 49.0231 | 49.0312 | 49.0202 | 49.0108 |
| Longitude                    | 12.109  | 12.101  | 12.108  | 12.082  | 12.102  | 12.096  | 12.057  | 12.089  |
| <b>Bird species observed</b> |         |         |         |         |         |         |         |         |
| <i>Acanthis flammea</i>      | 0       | 0       | 0       | 0       | 1       | 0       | 0       | 0       |
| <i>Anas platyrhynchos</i>    | 0       | 0       | 0       | 0       | 5       | 0       | 0       | 0       |
| <i>Carduelis carduelis</i>   | 0       | 0       | 0       | 0       | 0       | 0       | 0       | 4       |
| <i>Certhia brachydactyla</i> | 2       | 0       | 0       | 1       | 3       | 3       | 0       | 0       |
| <i>Chloris chloris</i>       | 9       | 0       | 0       | 1       | 3       | 0       | 0       | 0       |
| <i>Columba livia</i>         | 8       | 11      | 0       | 0       | 0       | 0       | 0       | 0       |
| <i>Columba palumbus</i>      | 7       | 0       | 7       | 8       | 3       | 4       | 2       | 0       |
| <i>Corvus corone</i>         | 0       | 2       | 0       | 0       | 0       | 5       | 0       | 0       |
| <i>Corvus frugilegus</i>     | 3       | 0       | 0       | 2       | 0       | 0       | 0       | 0       |

|                               | RG1 | RG2 | RG3 | RG4 | RG5 | RG6 | RG7 | RG8 |
|-------------------------------|-----|-----|-----|-----|-----|-----|-----|-----|
| <i>Cyanistes caeruleus</i>    | 15  | 5   | 15  | 7   | 4   | 8   | 2   | 12  |
| <i>Dendrocopos major</i>      | 2   | 2   | 2   | 1   | 4   | 5   | 0   | 0   |
| <i>Erithacus rubecula</i>     | 1   | 1   | 1   | 2   | 0   | 0   | 4   | 3   |
| <i>Fringilla coelebs</i>      | 8   | 3   | 0   | 0   | 10  | 2   | 0   | 0   |
| <i>Garrulus glandarius</i>    | 4   | 0   | 6   | 1   | 0   | 7   | 0   | 0   |
| <i>Motacilla alba</i>         | 0   | 0   | 0   | 0   | 1   | 0   | 0   | 0   |
| <i>Parus major</i>            | 16  | 7   | 13  | 4   | 3   | 9   | 9   | 5   |
| <i>Passer domesticus</i>      | 0   | 3   | 0   | 0   | 0   | 2   | 0   | 0   |
| <i>Passer montanus</i>        | 0   | 0   | 9   | 0   | 13  | 0   | 2   | 2   |
| <i>Periparus ater</i>         | 0   | 0   | 1   | 0   | 0   | 0   | 0   | 0   |
| <i>Phylloscopus collybita</i> | 3   | 0   | 2   | 2   | 2   | 1   | 7   | 37  |
| <i>Phylloscopus trochilus</i> | 0   | 0   | 0   | 0   | 0   | 0   | 1   | 1   |
| <i>Pica pica</i>              | 0   | 0   | 2   | 0   | 1   | 0   | 0   | 0   |
| <i>Regulus regulus</i>        | 0   | 0   | 0   | 1   | 0   | 0   | 0   | 5   |
| <i>Sitta europaea</i>         | 3   | 2   | 2   | 5   | 2   | 3   | 0   | 0   |
| <i>Sturnus vulgaris</i>       | 0   | 7   | 0   | 0   | 11  | 0   | 0   | 0   |
| <i>Sylvia atricapilla</i>     | 0   | 0   | 4   | 2   | 0   | 0   | 2   | 0   |
| <i>Turdus merula</i>          | 30  | 4   | 20  | 19  | 17  | 10  | 3   | 5   |
| <i>Turdus pilaris</i>         | 0   | 5   | 15  | 0   | 10  | 1   | 0   | 0   |
